# Supplementary material for: Associations between COPD related manifestations: a cross-sectional study
Source: PubMed Central journal article supplement (PMC3840707; doi:10.1186/1465-9921-14-129), 2013-11-19
Supplement: 1465-9921-14-129-S1.pdf [file 1465-9921-14-129-S1.pdf]

Additional file 1: Cox proportional-hazards for all-cause mortality

|                  | Per 10-fold increase in TAC | 95% CI      | p-value |
|------------------|-----------------------------|-------------|---------|
| TAC              | 2.20                        | 1.20 - 4.03 | 0.01    |
| TAC <sup>a</sup> | 2.08                        | 0.99 - 4.38 | 0.06    |
| TAC <sup>b</sup> | 1.97                        | 0.93 - 4.19 | 0.08    |
| TAC <sup>c</sup> | 2.09                        | 0.95 - 4.59 | 0.07    |

<sup>a</sup> after adjustment for age and sex

<sup>b</sup> after adjustment for age, sex and FEV<sub>1</sub>

<sup>c</sup> after adjustment for age, sex, FEV<sub>1</sub> and pack-years of smoking

CI=confidence interval, FEV<sub>1</sub>=forced expiratory volume in 1 second, TAC=thoracic aortic calcification
