# Supplementary material for: Associations between COPD related manifestations: a cross-sectional study
Source: PubMed Central journal article supplement (PMC3840707; doi:10.1186/1465-9921-14-129), 2013-11-19
Supplement: 1465-9921-14-129-S2.pdf [file 1465-9921-14-129-S2.pdf]

Additional file 2: Cox proportional-hazards for all-cause mortality

|                                              | Hazard ratio | 95% CI      | p-value |
|----------------------------------------------|--------------|-------------|---------|
| PWV                                          | 0.91         | 0.72 - 1.16 | 0.44    |
| PWV <sup>a</sup>                             | 0.86         | 0.67 - 1.10 | 0.23    |
| PWV <sup>b</sup>                             | 0.85         | 0.67 - 1.08 | 0.18    |
| PWV <sup>c</sup>                             | 0.81         | 0.62 - 1.06 | 0.13    |
| Bone attenuation/ SD                         | 0.98         | 0.68 - 1.40 | 0.90    |
| Bone attenuation/ SD <sup>a</sup>            | 1.04         | 0.72 - 1.50 | 0.84    |
| Bone attenuation/ SD <sup>b</sup>            | 1.10         | 0.76 - 1.57 | 0.62    |
| Bone attenuation/ SD <sup>c</sup>            | 1.11         | 0.77 - 1.60 | 0.58    |
| 15 <sup>th</sup> percentile/ SD              | 0.70         | 0.49 - 1.00 | 0.05    |
| 15 <sup>th</sup> percentile/ SD <sup>a</sup> | 0.65         | 0.45 - 0.95 | 0.03    |
| 15 <sup>th</sup> percentile/ SD <sup>b</sup> | 0.69         | 0.46 - 1.04 | 0.07    |
| 15 <sup>th</sup> percentile/ SD <sup>c</sup> | 0.66         | 0.43 - 1.01 | 0.06    |

<sup>a</sup> after adjustment for age and sex

<sup>b</sup> after adjustment for age, sex and FEV<sub>1</sub>

<sup>c</sup> after adjustment for age, sex, FEV<sub>1</sub> and pack-years of smoking

CI=confidence interval, FEV<sub>1</sub>=forced expiratory volume in 1 second, PWV=pulse wave velocity,

SD=standard deviation
